# Supplementary material
Source: PubMed Central journal article supplement (PMC7402026)
Supplement: MRM-84-2592-s001.pdf [file MRM-84-2592-s001.pdf]

## Supporting Information: Gradient of Non-Linear Cost Function

Minimizing Eq. (1) with a gradient-based technique requires calculating its gradient. An analytical formulation for  $\nabla f = [\partial_{\mathbf{W}} f, \partial_{\mathbf{F}} f, \partial_{\mathbf{R}_2^*} f]$  of the data consistency term

$$f = \sum_{c,t_n} \|E(\mathbf{W}, \mathbf{F}, \mathbf{R}_2^*)_{c,t_n} - \mathbf{Y}_{c,t_n}\|_2^2 = \sum_{c,t_n} \|\mathbf{R}_{c,t_n}\|_2^2$$

can be derived following the description in (1). For simplification,  $\mathbf{R}_{c,t_n}$  is used here to denote the data residual. The gradient with respect to water, fat, and  $\mathbf{R}_2^*$  can then be calculated with

$$\frac{\partial f}{\partial \mathbf{W}} = \sum_{c,t_n} e^{-\mathbf{R}_2^* t_n} \operatorname{Re} \left\{ \overline{\mathbf{C}}_c e^{-2\pi i \boldsymbol{\Phi} t_n} \operatorname{FT}^{-1}(\mathbf{R}_{c,t_n}) \right\},$$

$$\frac{\partial f}{\partial \mathbf{F}} = \sum_{c,t_n} e^{-\mathbf{R}_2^* t_n} \operatorname{Re} \left\{ \overline{\mathbf{C}}_c e^{-2\pi i \boldsymbol{\Phi} t_n} \operatorname{FT}^{-1}(\overline{\mathbf{D}}_{t_n} \mathbf{R}_{c,t_n}) \right\},$$

and

$$\begin{aligned} \frac{\partial f}{\partial \mathbf{R}_2^*} &= \sum_{c,t_n} (-t_n) e^{-\mathbf{R}_2^* t_n} \operatorname{Re} \left\{ \overline{\mathbf{C}}_c e^{-2\pi i \boldsymbol{\Phi} t_n} \overline{\mathbf{W}} \operatorname{FT}^{-1}(\mathbf{R}_{c,t_n}) \right\} \\ &\quad + \sum_{c,t_n} (-t_n) e^{-\mathbf{R}_2^* t_n} \operatorname{Re} \left\{ \overline{\mathbf{C}}_c e^{-2\pi i \boldsymbol{\Phi} t_n} \overline{\mathbf{F}} \operatorname{FT}^{-1}(\overline{\mathbf{D}}_{t_n} \mathbf{R}_{c,t_n}) \right\}. \end{aligned}$$

Here,  $\overline{A}$  corresponds the complex conjugate of  $A$ , and  $\operatorname{FT}^{-1}(\cdot)$  performs an inverse non-uniform fast Fourier transform (NUFFT). For minimizing the  $\ell_1$  norm of the regularization terms, the reader is referred to (2).

## References

1. Block KT, Uecker M, Frahm J. Model-based iterative reconstruction for radial fast spin-echo MRI. *IEEE Trans Med Imag* 2009;28(11):1759–1769.
2. Lustig M, Donoho D, Pauly JM. Sparse MRI: The application of compressed sensing for rapid MR imaging. *Magn Reson Med* 2007;58(6):1182–1195.

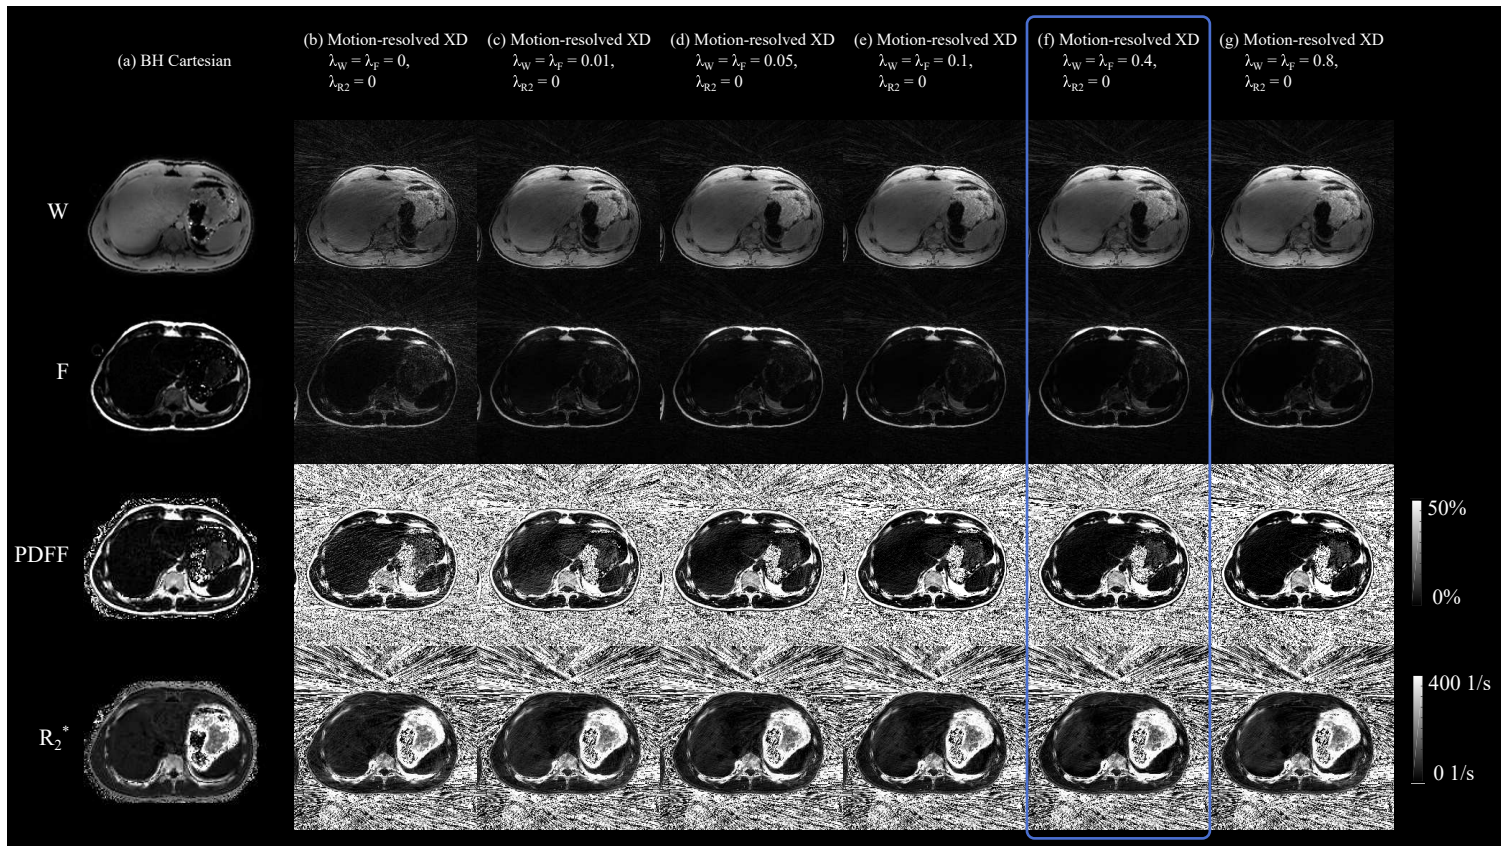

**Supporting Information Figure S1.** Effect of  $\lambda_W$  and  $\lambda_F$  regularization strength. In-vivo patient maps of **(a)** the Cartesian reference scan and **(b)-(g)** motion-resolved free-breathing maps for varying regularization weights  $\lambda_W$ ,  $\lambda_F$  and  $\lambda_{R_2^*} = 0$ . Chosen  $\lambda_W$  and  $\lambda_F$  values are framed. The Dixon-RAVE sequence did not apply “prescan normalize”, resulting in a noticeable intensity drop in the water and fat maps towards the center compared to BH Cartesian (noticeable especially in the top row).

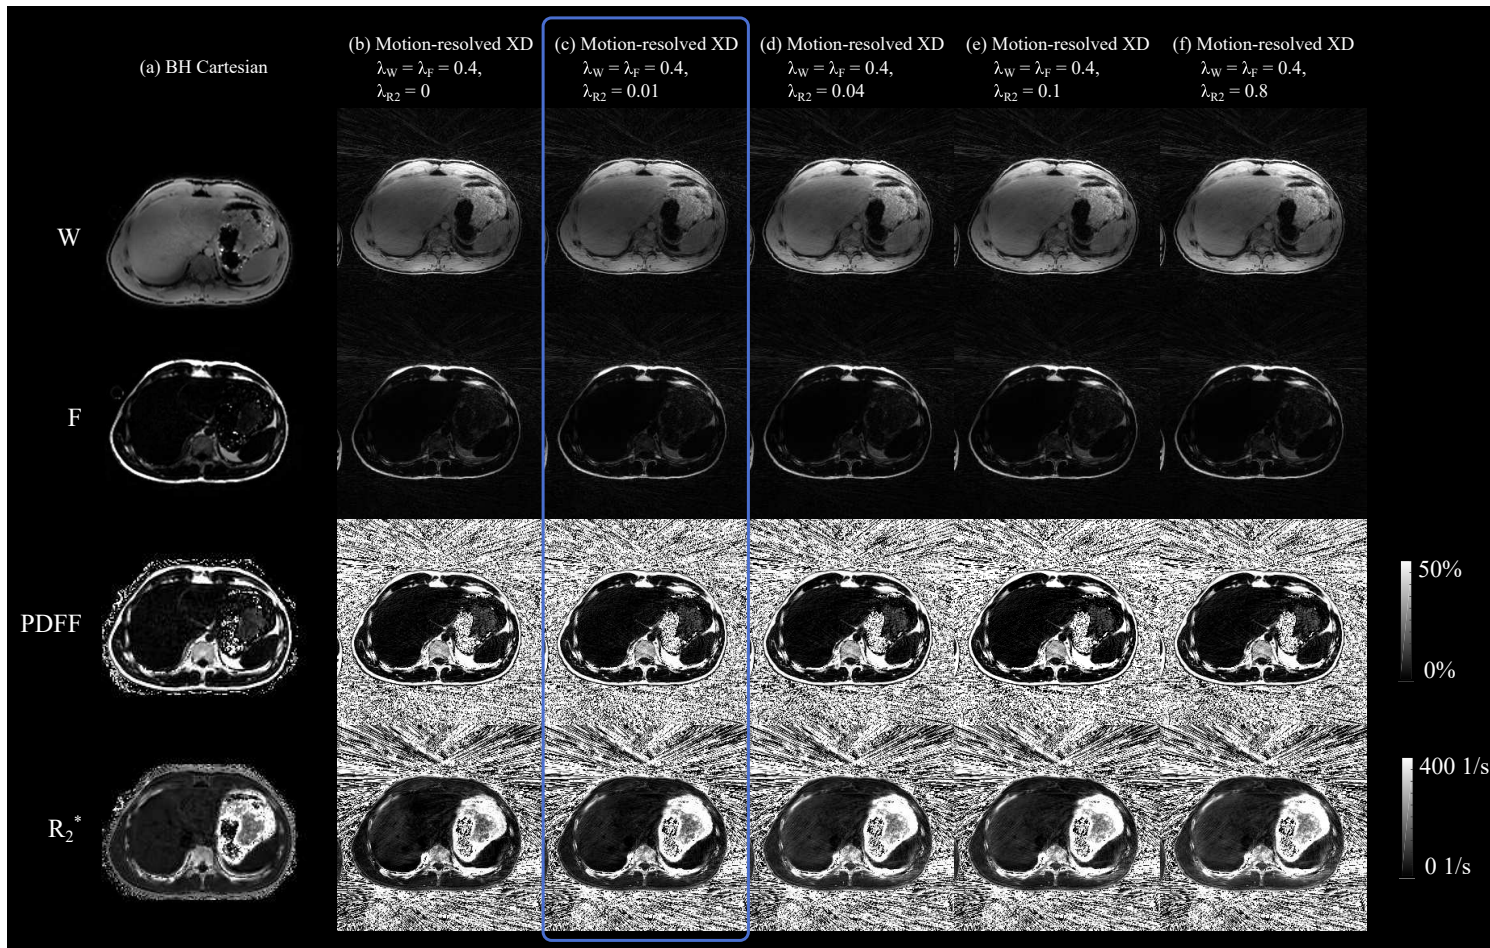

**Supporting Information Figure S2.** Effect of  $\lambda_{R_2^*}$  regularization strength on motion-resolved maps. In-vivo patient maps from (a) Cartesian reference scan and (b)-(g) motion-resolved reconstruction for varying  $R_2^*$  regularization weights ( $\lambda_W = \lambda_F = 0.4$ ). Maps of the chosen  $\lambda_{R_2^*}$  value are framed. The Dixon-RAVE sequence did not apply “prescan normalize”, resulting in a noticeable intensity drop in the water and fat maps towards the center compared to BH Cartesian (noticeable especially in the top row).

**Supporting Information Figure S3.** Example water, fat,  $R_2^*$ , and PDFF maps (from left to right) of the methods “Motion-resolved XD” (top) and “Motion-averaged” (bottom) from a patient (male, age: 25 years, weight: 78 kg, BMI: 24.6 kg m<sup>-2</sup>). This animation is additionally included in a separate file (SupplFig3.gif).

**Supporting Information Figure S4.** Example water, fat,  $R_2^*$ , and PDFF maps (from left to right) of the methods “Motion-resolved XD” (top) and “Motion-averaged” (bottom) for a patient (female, age: 50 years, weight: 59.9 kg, BMI: 24.1 kg m<sup>-2</sup>) with elevated PDFF and  $R_2^*$ . This animation is additionally included in a separate file (SupplFig4.gif).

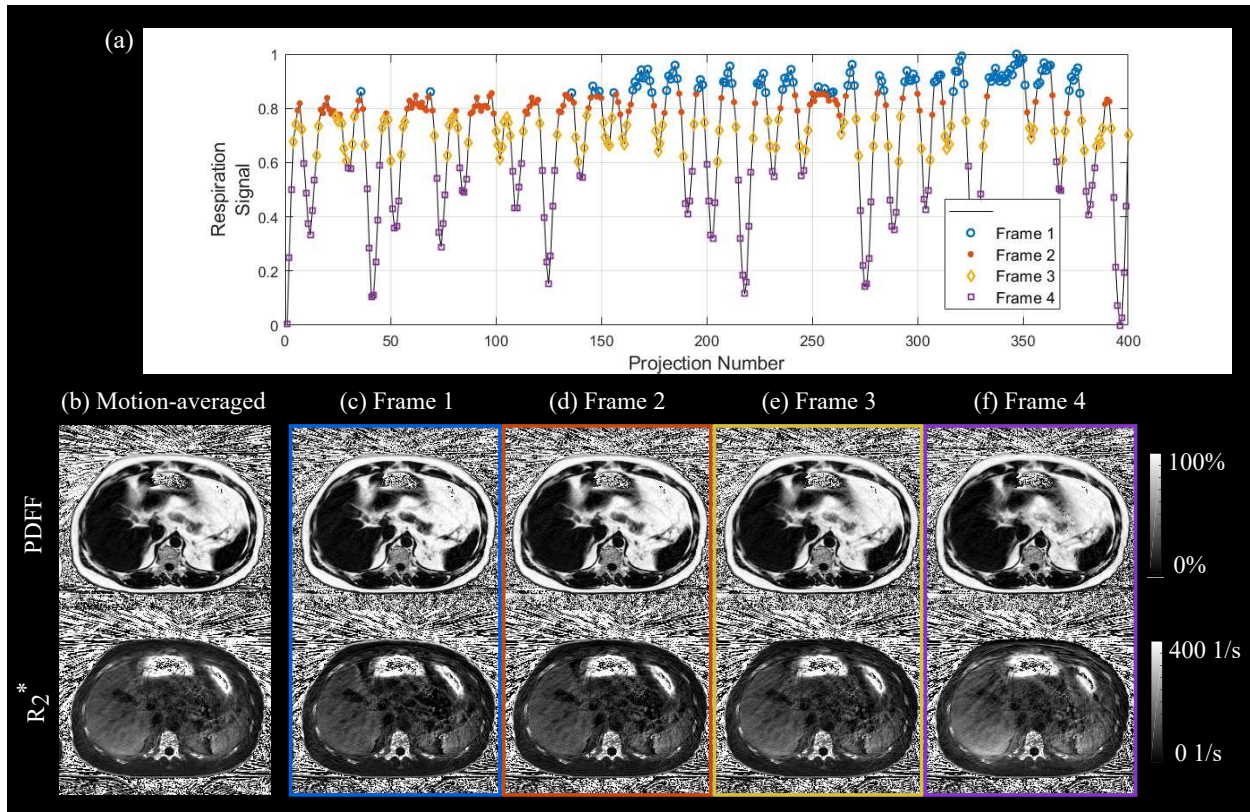

**Supporting Information Figure S5.** Estimated respiratory signal (a), and PDFF (top) and  $R_2^*$  (bottom) maps of a patient with slightly elevated  $R_2^*$  values, reconstructed using the motion-averaged reconstruction (b). Motion-resolved XD reconstruction for frame 1 (end-expiration) to frame 4 (end-inspiration) are shown in (c)-(f). The motion-resolved XD parameter maps corresponding to frame 2 are selected for quantitative evaluation.

(a) Motion-averaged vs. BH Cartesian

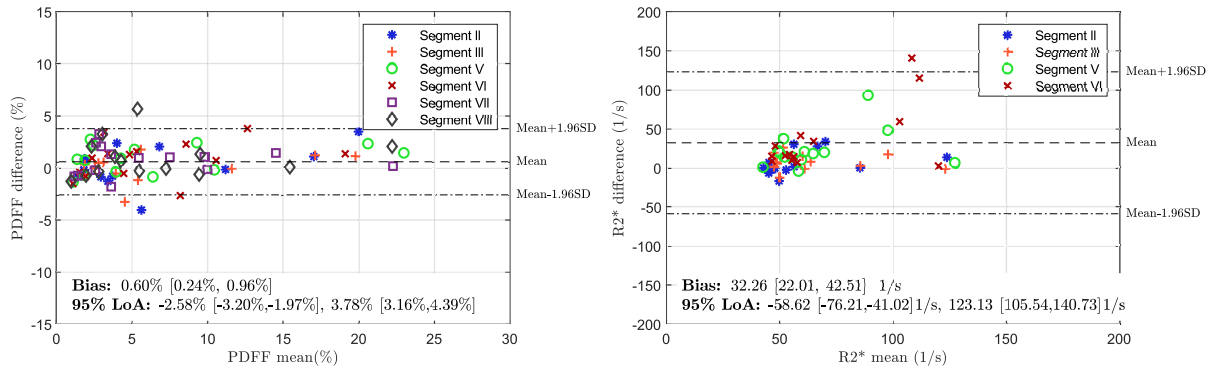

(b) Motion-gated Regriding (25% accept.) vs. BH Cartesian

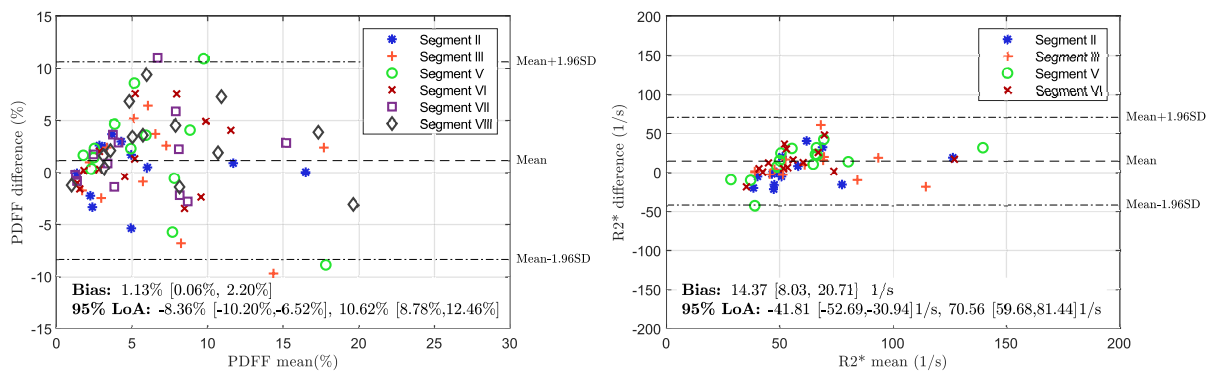

(c) Motion-resolved XD vs. BH Cartesian

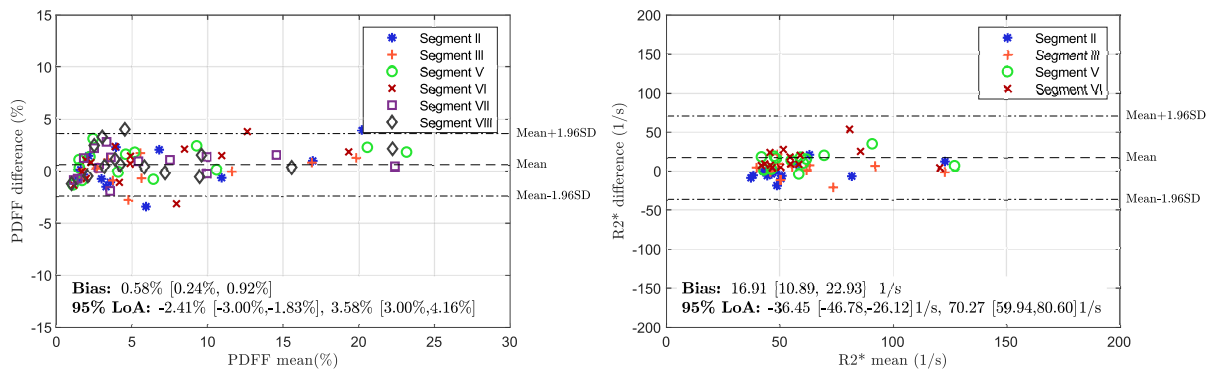

**Supporting Information Figure S6.** Bland-Altman plots for the measured (left) PDFD and (right)  $R_2^*$  values, depicting the agreement of (a) motion-averaged reconstructions to the Cartesian reference, (b) motion-gated (25% acceptance rate) reconstructions followed by regriding and image-based water/fat separation to the Cartesian reference, and (c) motion-resolved XD reconstructions to the Cartesian reference. The plots indicate overall biases, 95% LoA and their 95% confidence intervals.
